# Supplementary material for: Plasma Concentrations of Gut Hormones Acyl Ghrelin and Peptide YY and Subsequent Risk of Colorectal Cancer and Molecular Tumor Subtypes
Source: Oxford University Press journal article supplement (doi:10.1158/1940-6207.capr-22-0325), 2022-11-07
Supplement: capr-22-0325_supplementary_table_s2_suppst2.xlsx [file capr-22-0325_supplementary_table_s2_suppst2.xlsx]

## Sheet: Table S2.BRAF KRAS status
Supplementary Table S2. Associations between peptide YY (PYY) and subtypes of colorectal cancer based on BRAF/KRAS status in minimally and fully adjusted models.
	Set	Exposure	Q1a	Q2a	Q3a	Q4a	P_trend	P_heterogeneity	Continuous (per sex specific SD)	P_heterogeneity
								0.10		0.43
Unadjusted OR (95% CI)	BRAF	PYY	Ref	0.51 (0.25-1.02)	0.84 (0.44-1.6)	0.99 (0.54-1.84)	0.45		1.12 (0.9-1.4)
Multivariable-adjusted OR (95% CI)b	BRAF	PYY	Ref	0.49 (0.24-1)	0.79 (0.4-1.56)	0.98 (0.51-1.88)	0.5		1.11 (0.88-1.41)
Multivariable-adjustedb + BMI OR (95% CI)	BRAF	PYY	Ref	0.49 (0.24-1)	0.79 (0.4-1.57)	0.97 (0.51-1.88)	0.5		1.11 (0.88-1.41)
Multivariable-adjustedb + BMI OR (95% CI) + dilution correctedc	BRAF	PYY							1.23 (0.79-1.92)
n (case/control)			41/35	33/49	39/37	43/35			156/156
Unadjusted OR (95% CI)	KRAS	PYY	Ref	1.99 (0.96-4.11)	2.35 (1.17-4.73)	1.69 (0.78-3.66)	0.43		1.09 (0.84-1.42)
Multivariable-adjusted OR (95% CI)b	KRAS	PYY	Ref	1.94 (0.93-4.06)	2.29 (1.1-4.75)	1.73 (0.78-3.83)	0.42		1.08 (0.83-1.41)
Multivariable-adjustedb + BMI OR (95% CI)	KRAS	PYY	Ref	1.92 (0.91-4.06)	2.27 (1.09-4.74)	1.71 (0.76-3.83)	0.45		1.07 (0.82-1.41)
Multivariable-adjustedb + BMI OR (95% CI) + dilution correctedc	BRAF	PYY							1.15 (0.69-1.92)
n (case/control)			27/42	44/40	56/42	40/43			167/167
Unadjusted OR (95% CI)	KRAS/BRAF wildtype	PYY	Ref	1.03 (0.68-1.57)	0.99 (0.66-1.48)	0.98 (0.65-1.48)	0.86		1 (0.88-1.14)
Multivariable-adjusted OR (95% CI)b	KRAS/BRAF wildtype	PYY	Ref	1.02 (0.66-1.56)	0.97 (0.64-1.46)	0.93 (0.61-1.42)	0.67		0.98 (0.86-1.12)
Multivariable-adjustedb + BMI OR (95% CI)	KRAS/BRAF wildtype	PYY	Ref	1.02 (0.66-1.56)	0.95 (0.63-1.44)	0.91 (0.6-1.39)	0.6		0.98 (0.85-1.11)
Multivariable-adjustedb + BMI OR (95% CI) + dilution correctedc	KRAS/BRAF wildtype	PYY							0.95 (0.74-1.23)
n (case/control)			89/89	96/93	101/102	95/97			381/381
aSex- specific quartiles of acyl ghrelin and PYY based on the control participants
badjusted for smoking status, recreational physical activity, and alcohol intake
ccorrected using the intraclass correlation coefficient of 0.71

## Sheet: Table S2.MSI status
Supplementary Table S2. Associations between peptide YY (PYY) and subtypes of colorectal cancer based on MSI status in minimally and fully adjusted models.
	Set	Exposure	Q1a	Q2a	Q3a	Q4a	P_trend	P_heterogeneity	Continuous (per sex specific SD)	P_heterogeneity
								0.22		1.00
Unadjusted OR (95% CI)	MSI	PYY	Ref	0.56 (0.22-1.42)	1.38 (0.62-3.1)	0.88 (0.38-2.05)	0.64		1.03 (0.79-1.33)
Multivariable-adjusted OR (95% CI)b	MSI	PYY	Ref	0.66 (0.24-1.83)	1.49 (0.57-3.87)	0.98 (0.38-2.57)	0.63		1.01 (0.76-1.35)
Multivariable-adjustedb + BMI OR (95% CI)	MSI	PYY	Ref	0.64 (0.23-1.8)	1.48 (0.57-3.84)	0.98 (0.37-2.57)	0.62		1.01 (0.76-1.35)
Multivariable-adjustedb + BMI OR (95% CI) + dilution correctedc	MSI	PYY							1.02 (0.58-1.79)
n (case/control)			22/22	20/30	30/20	24/24			96/96
Unadjusted OR (95% CI)	MSS	PYY	Ref	1.12 (0.8-1.57)	1.1 (0.79-1.52)	1.1 (0.79-1.54)	0.68		1.06 (0.95-1.19)
Multivariable-adjusted OR (95% CI)b	MSS	PYY	Ref	1.13 (0.8-1.59)	1.07 (0.77-1.49)	1.09 (0.77-1.52)	0.79		1.05 (0.94-1.18)
Multivariable-adjustedb + BMI OR (95% CI)	MSS	PYY	Ref	1.12 (0.79-1.58)	1.06 (0.76-1.48)	1.07 (0.76-1.5)	0.88		1.04 (0.93-1.17)
Multivariable-adjustedb + BMI OR (95% CI) + dilution correctedc	MSS	PYY							1.09 (0.87-1.36)
n (case/control)			136/146	152/147	162/160	162/159			612/612
aSex- specific quartiles of acyl ghrelin and PYY based on the control participants
badjusted for smoking status, recreational physical activity, and alcohol intake
ccorrected using the intraclass correlation coefficient of 0.71

## Sheet: Table S2.Tumor location
Supplementary Table S2. Associations between peptide YY (PYY) and subtypes of colorectal cancer based on tumor location in minimally and fully adjusted models.
	Set	Exposure	Q1a	Q2a	Q3a	Q4a	P_trend	P_heterogeneity	Continuous (per sex specific SD)	P_heterogeneity
								0.91		0.55
Unadjusted OR (95% CI)	Right Colon	PYY	Ref	0.99 (0.61-1.61)	1.15 (0.72-1.82)	1.28 (0.81-2.04)	0.21		1.1 (0.93-1.3)
Multivariable-adjusted OR (95% CI)b	Right Colon	PYY	Ref	1 (0.61-1.64)	1.14 (0.72-1.83)	1.26 (0.79-2.02)	0.25		1.09 (0.92-1.3)
Multivariable-adjustedb + BMI OR (95% CI)	Right Colon	PYY	Ref	0.99 (0.6-1.63)	1.11 (0.69-1.77)	1.23 (0.76-1.96)	0.32		1.08 (0.91-1.28)
Multivariable-adjustedb + BMI OR (95% CI) + dilution correctedc	Right Colon	PYY							1.16 (0.83-1.61)
n (case/control)			76/83	80/88	77/74	85/73			318/318
Unadjusted OR (95% CI)	Left Colon	PYY	Ref	1.16 (0.73-1.83)	1.47 (0.93-2.33)	1.25 (0.78-1.99)	0.38		1.09 (0.94-1.26)
Multivariable-adjusted OR (95% CI)b	Left Colon	PYY	Ref	1.18 (0.74-1.89)	1.48 (0.93-2.37)	1.29 (0.8-2.07)	0.34		1.08 (0.93-1.27)
Multivariable-adjustedb + BMI OR (95% CI)	Left Colon	PYY	Ref	1.19 (0.74-1.9)	1.48 (0.93-2.38)	1.27 (0.79-2.05)	0.37		1.08 (0.93-1.26)
Multivariable-adjustedb + BMI OR (95% CI) + dilution correctedc	Left Colon	PYY							1.16 (0.86-1.56)
n (case/control)			63/76	64/68	88/72	81/80			296/296
Unadjusted OR (95% CI)	Rectum	PYY	Ref	1.16 (0.76-1.77)	1.14 (0.77-1.7)	1.09 (0.72-1.65)	0.83		1 (0.86-1.16)
Multivariable-adjusted OR (95% CI)b	Rectum	PYY	Ref	1.16 (0.76-1.78)	1.13 (0.75-1.7)	1.07 (0.7-1.62)	0.92		0.99 (0.85-1.15)
Multivariable-adjustedb + BMI OR (95% CI)	Rectum	PYY	Ref	1.15 (0.75-1.77)	1.11 (0.74-1.67)	1.05 (0.69-1.6)	0.98		0.98 (0.84-1.14)
Multivariable-adjustedb + BMI OR (95% CI) + dilution correctedc	Rectum	PYY							0.96 (0.71-1.29)
n (case/control)			85/93	98/93	108/104	97/98			388/388
aSex- specific quartiles of acyl ghrelin and PYY based on the control participants
badjusted for smoking status, recreational physical activity, and alcohol intake
ccorrected using the intraclass correlation coefficient of 0.71

## Sheet: Table S2.Tumor stage
Supplementary Table S2. Associations between peptide YY (PYY) and subtypes of colorectal cancer based on tumor stage in minimally and fully adjusted models.
	Set	Exposure	Q1a	Q2a	Q3a	Q4a	P_trend	P_heterogeneity	Continuous (per sex specific SD)	P_heterogeneity
								0.92		0.77
Unadjusted OR (95% CI)	Stage I-II	PYY	Ref	1.01 (0.69-1.48)	1.09 (0.76-1.58)	1.14 (0.78-1.66)	0.44		1.05 (0.92-1.19)
Multivariable-adjusted OR (95% CI)b	Stage I-II	PYY	Ref	1.02 (0.69-1.5)	1.08 (0.74-1.57)	1.1 (0.74-1.61)	0.6		1.03 (0.91-1.17)
Multivariable-adjustedb + BMI OR (95% CI)	Stage I-II	PYY	Ref	1.03 (0.7-1.52)	1.08 (0.74-1.57)	1.09 (0.74-1.6)	0.65		1.03 (0.91-1.17)
Multivariable-adjustedb + BMI OR (95% CI) + dilution correctedc	Stage I-II	PYY							1.06 (0.83-1.35)
n (case/control)			110/116	122/128	124/120	122/114			478/478
Unadjusted OR (95% CI)	Stage III-IV	PYY	Ref	1.16 (0.79-1.7)	1.42 (0.99-2.04)	1.27 (0.88-1.84)	0.2		1.1 (0.96-1.26)
Multivariable-adjusted OR (95% CI)b	Stage III-IV	PYY	Ref	1.13 (0.77-1.67)	1.38 (0.95-1.99)	1.27 (0.88-1.84)	0.2		1.1 (0.96-1.26)
Multivariable-adjustedb + BMI OR (95% CI)	Stage III-IV	PYY	Ref	1.12 (0.76-1.65)	1.32 (0.91-1.93)	1.23 (0.85-1.79)	0.27		1.08 (0.94-1.23)
Multivariable-adjustedb + BMI OR (95% CI) + dilution correctedc	Stage III-IV	PYY							1.15 (0.88-1.5)
n (case/control)			104/125	104/109	132/112	128/122			468/468
aSex- specific quartiles of acyl ghrelin and PYY based on the control participants
badjusted for smoking status, recreational physical activity, and alcohol intake
ccorrected using the intraclass correlation coefficient of 0.71

## Sheet: Table S2.Lag time
Supplementary Table S2. Associations between peptide YY (PYY) and subtypes of colorectal cancer based on lag time in minimally and fully adjusted models.
	Set	Exposure	Q1a	Q2a	Q3a	Q4a	P_trend	P_heterogeneity	Continuous (per sex specific SD)	P_heterogeneity
								0.58		0.58
Unadjusted OR (95% CI)	Lag time <9 years	PYY	Ref	1.01 (0.63-1.6)	1.45 (0.93-2.27)	1.08 (0.68-1.7)	0.63		1.07 (0.91-1.26)
Multivariable-adjusted OR (95% CI)b	Lag time <9 years	PYY	Ref	0.98 (0.62-1.57)	1.43 (0.91-2.25)	1.03 (0.65-1.64)	0.73		1.06 (0.9-1.25)
Multivariable-adjustedb + BMI OR (95% CI)	Lag time <9 years	PYY	Ref	0.98 (0.62-1.57)	1.43 (0.91-2.25)	1.03 (0.65-1.64)	0.75		1.06 (0.9-1.25)
Multivariable-adjustedb + BMI OR (95% CI) + dilution correctedc	Lag time <9 years	PYY							1.11 (0.81-1.54)
n (case/control)			65/74	67/76	101/79	87/91			320/320
Unadjusted OR (95% CI)	Lag time 9-15 years	PYY	Ref	1.07 (0.69-1.65)	1.08 (0.7-1.65)	1.2 (0.77-1.89)	0.43		1.08 (0.94-1.25)
Multivariable-adjusted OR (95% CI)b	Lag time 9-15 years	PYY	Ref	1.08 (0.69-1.69)	1.06 (0.68-1.64)	1.19 (0.75-1.89)	0.47		1.07 (0.93-1.24)
Multivariable-adjustedb + BMI OR (95% CI)	Lag time 9-15 years	PYY	Ref	1.08 (0.69-1.7)	1.03 (0.66-1.6)	1.16 (0.73-1.85)	0.56		1.06 (0.92-1.22)
Multivariable-adjustedb + BMI OR (95% CI) + dilution correctedc	Lag time 9-15 years	PYY							1.12 (0.85-1.47)
n (case/control)			78/84	88/89	93/94	79/71			338/338
Unadjusted OR (95% CI)	Lag time >15 years	PYY	Ref	1.21 (0.77-1.91)	1.18 (0.76-1.83)	1.29 (0.84-1.99)	0.31		1.01 (0.86-1.19)
Multivariable-adjusted OR (95% CI)b	Lag time >15 years	PYY	Ref	1.18 (0.74-1.87)	1.14 (0.73-1.78)	1.24 (0.8-1.93)	0.4		0.99 (0.84-1.17)
Multivariable-adjustedb + BMI OR (95% CI)	Lag time >15 years	PYY	Ref	1.15 (0.72-1.83)	1.11 (0.71-1.74)	1.21 (0.78-1.88)	0.47		0.98 (0.83-1.16)
Multivariable-adjustedb + BMI OR (95% CI) + dilution correctedc	Lag time >15 years	PYY							0.96 (0.69-1.32)
n (case/control)			85/97	88/86	80/79	99/90			352/352
aSex- specific quartiles of acyl ghrelin and PYY based on the control participants
badjusted for smoking status, recreational physical activity, and alcohol intake
ccorrected using the intraclass correlation coefficient of 0.71

## Sheet: Table S2.BMI
Supplementary Table S2. Associations between peptide YY (PYY) and subtypes of colorectal cancer based on BMI groups in minimally and fully adjusted models.
	Set	Exposure	Q1a	Q2a	Q3a	Q4a	P_trend	P_heterogeneity	Continuous (per sex specific SD)	P_heterogeneity
								0.63		0.73
Unadjusted OR (95% CI)b	BMI < 25	PYY	1.00	0.99 (0.67-1.44)	0.91 (0.62-1.33)	1.04 (0.71-1.54)	0.85		0.99 (0.87-1.12)
Multivariable-adjusted OR (95% CI)c	BMI < 25	PYY	1.00	0.97 (0.66-1.43)	0.91 (0.62-1.33)	1.02 (0.69-1.51)	0.93		0.98 (0.86-1.11)
Multivariable-adjusted OR (95% CI)c + dilution correctedd	BMI < 25	PYY							0.96 (0.75-1.22)
n (case/control)			103/116	99/113	95/118	95/101			392/448
Unadjusted OR (95% CI)b	BMI 25-30	PYY	1.00	1.14 (0.78-1.67)	1.47 (1.01-2.14)	1.2 (0.82-1.75)	0.35		1.08 (0.93-1.26)
Multivariable-adjusted OR (95% CI)c	BMI 25-30	PYY	1.00	1.11 (0.76-1.63)	1.41 (0.97-2.07)	1.17 (0.8-1.71)	0.41		1.08 (0.93-1.25)
Multivariable-adjusted OR (95% CI)c + dilution correctedd	BMI 25-30	PYY							1.15 (0.86-1.54)
n (case/control)			104/112	109/104	133/100	116/107			462/423
Unadjusted OR (95% CI)b	BMI > 30	PYY	1.00	1.4 (0.66-3)	1.77 (0.86-3.72)	1.69 (0.84-3.46)	0.21		1.18 (0.96-1.47)
Multivariable-adjusted OR (95% CI)c	BMI > 30	PYY	1.00	1.63 (0.75-3.57)	1.92 (0.91-4.11)	1.77 (0.86-3.68)	0.24		1.18 (0.96-1.47)
Multivariable-adjusted OR (95% CI)c + dilution correctedd	BMI > 30	PYY							1.37 (0.91-2.05)
n (case/control)			21/27	35/34	46/34	54/44			156/139
aSex- specific quartiles of acyl ghrelin and PYY based on the control participants
bLogistic regression adjusted for matching variables age, sex, cohort, sampling year, and fasting status (since matched cases and controls where split in the subgroup-analysis for BMI)
cadditionally adjusted for smoking status, recreational physical activity, and alcohol intake
dcorrected using the intraclass correlation coefficient of 0.71
